# Supplementary material for: Antibiotic potentiation and inhibition of cross-resistance in pathogens associated with cystic fibrosis
Source: eLife journal article supplement (doi:10.7554/elife.91082), 2023-10-11

# **IMMUNOBLOTS**

# Figure 2A

**A**

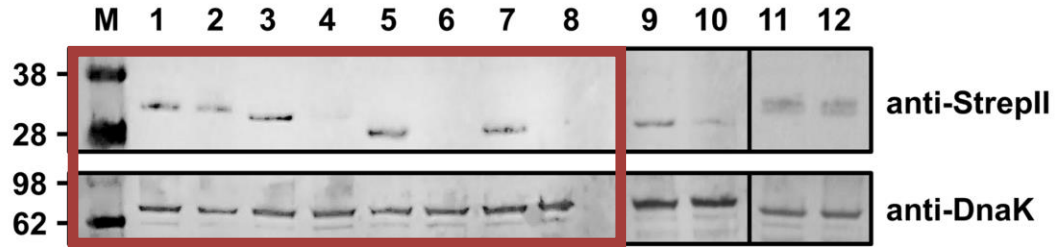

| LANE | STRAIN                                                  |                                                         |
|------|---------------------------------------------------------|---------------------------------------------------------|
| 1    | MC1000                                                  | pDM1- <i>bla</i> <sub>L2-1</sub> -StrepII               |
| 2    |                                                         | <i>dsbA</i> pDM1- <i>bla</i> <sub>L2-1</sub> -StrepII   |
| 3    |                                                         | pDM1- <i>bla</i> <sub>AIM-1</sub> -StrepII              |
| 4    |                                                         | <i>dsbA</i> pDM1- <i>bla</i> <sub>AIM-1</sub> -StrepII  |
| 5    |                                                         | pDM1- <i>bla</i> <sub>BEL-1</sub> -StrepII              |
| 6    |                                                         | <i>dsbA</i> pDM1- <i>bla</i> <sub>BEL-1</sub> -StrepII  |
| 7    |                                                         | pDM1- <i>bla</i> <sub>OXA-50</sub> -StrepII             |
| 8    |                                                         | <i>dsbA</i> pDM1- <i>bla</i> <sub>OXA-50</sub> -StrepII |
| 9    | pDM1- <i>bla</i> <sub>CARB-2</sub> -StrepII             |                                                         |
| 10   | <i>dsbA</i> pDM1- <i>bla</i> <sub>CARB-2</sub> -StrepII |                                                         |
| 11   | pDM1- <i>bla</i> <sub>BPS-1m</sub> -StrepII             |                                                         |
| 12   | <i>dsbA</i> pDM1- <i>bla</i> <sub>BPS-1m</sub> -StrepII |                                                         |

## FULL IMMUNOBLOT

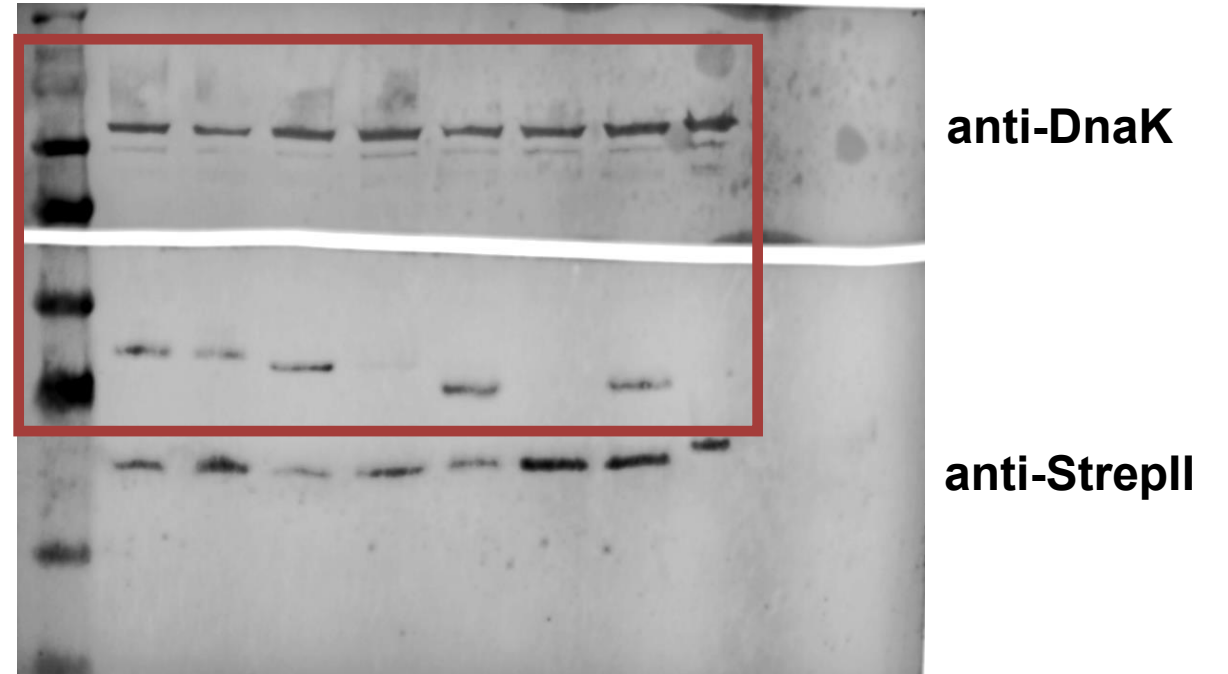

# Figure 2A

**A**

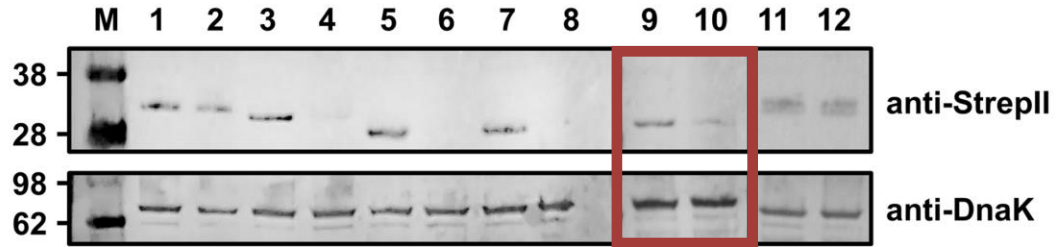

| LANE | STRAIN                                                  |                                                         |
|------|---------------------------------------------------------|---------------------------------------------------------|
| 1    | MC1000                                                  | pDM1- <i>bla</i> <sub>L2-1</sub> -StrepII               |
| 2    |                                                         | <i>dsbA</i> pDM1- <i>bla</i> <sub>L2-1</sub> -StrepII   |
| 3    |                                                         | pDM1- <i>bla</i> <sub>AIM-1</sub> -StrepII              |
| 4    |                                                         | <i>dsbA</i> pDM1- <i>bla</i> <sub>AIM-1</sub> -StrepII  |
| 5    |                                                         | pDM1- <i>bla</i> <sub>BEL-1</sub> -StrepII              |
| 6    |                                                         | <i>dsbA</i> pDM1- <i>bla</i> <sub>BEL-1</sub> -StrepII  |
| 7    |                                                         | pDM1- <i>bla</i> <sub>OXA-50</sub> -StrepII             |
| 8    |                                                         | <i>dsbA</i> pDM1- <i>bla</i> <sub>OXA-50</sub> -StrepII |
| 9    | pDM1- <i>bla</i> <sub>CARB-2</sub> -StrepII             |                                                         |
| 10   | <i>dsbA</i> pDM1- <i>bla</i> <sub>CARB-2</sub> -StrepII |                                                         |
| 11   |                                                         | pDM1- <i>bla</i> <sub>BPS-1m</sub> -StrepII             |
| 12   |                                                         | <i>dsbA</i> pDM1- <i>bla</i> <sub>BPS-1m</sub> -StrepII |

## FULL IMMUNOBLOT

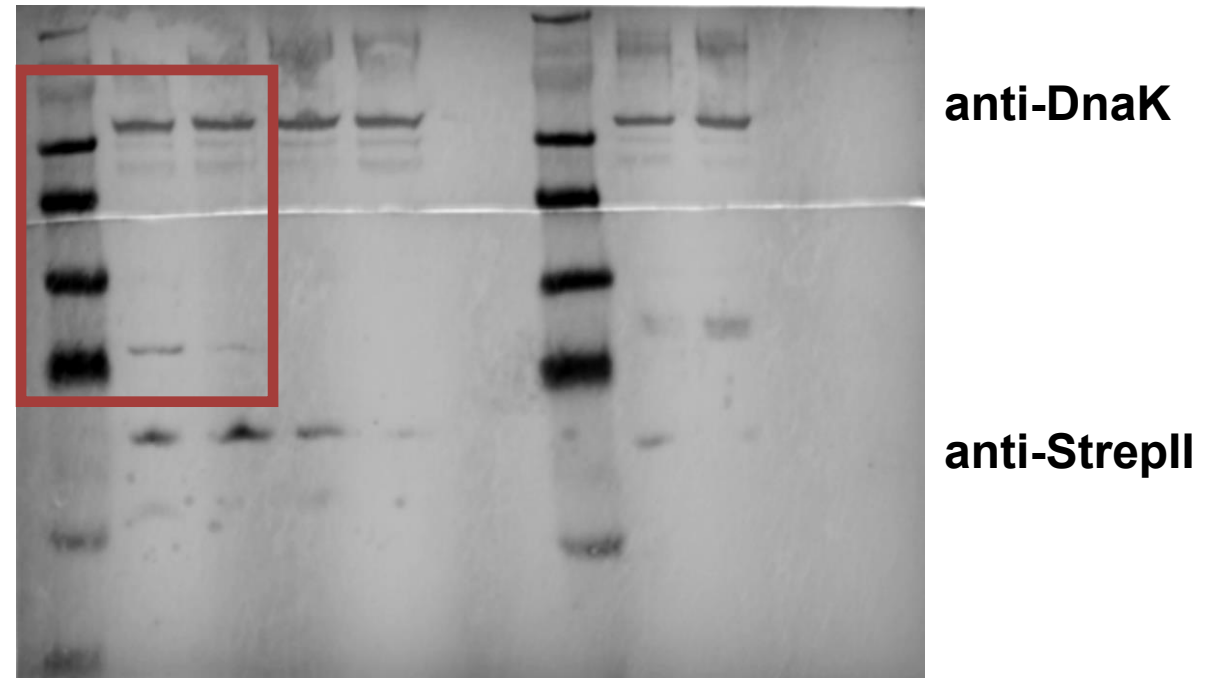

# Figure 2A

**A**

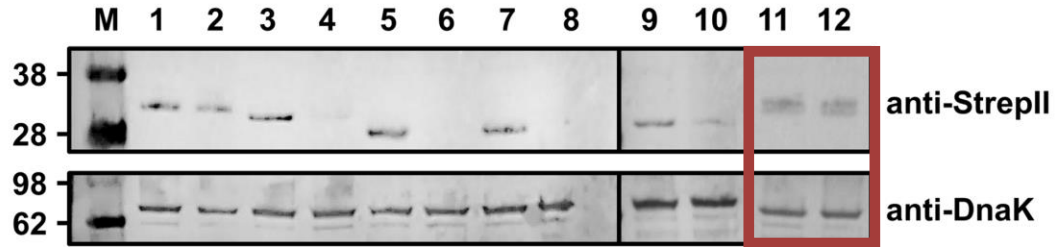

| LANE | STRAIN                                                  |
|------|---------------------------------------------------------|
| 1    | pDM1- <i>bla</i> <sub>L2-1</sub> -StrepII               |
| 2    | <i>dsbA</i> pDM1- <i>bla</i> <sub>L2-1</sub> -StrepII   |
| 3    | pDM1- <i>bla</i> <sub>AIM-1</sub> -StrepII              |
| 4    | <i>dsbA</i> pDM1- <i>bla</i> <sub>AIM-1</sub> -StrepII  |
| 5    | pDM1- <i>bla</i> <sub>BEL-1</sub> -StrepII              |
| 6    | <i>dsbA</i> pDM1- <i>bla</i> <sub>BEL-1</sub> -StrepII  |
| 7    | pDM1- <i>bla</i> <sub>OXA-50</sub> -StrepII             |
| 8    | <i>dsbA</i> pDM1- <i>bla</i> <sub>OXA-50</sub> -StrepII |
| 9    | pDM1- <i>bla</i> <sub>CARB-2</sub> -StrepII             |
| 10   | <i>dsbA</i> pDM1- <i>bla</i> <sub>CARB-2</sub> -StrepII |
| 11   | pDM1- <i>bla</i> <sub>BPS-1m</sub> -StrepII             |
| 12   | <i>dsbA</i> pDM1- <i>bla</i> <sub>BPS-1m</sub> -StrepII |

## FULL IMMUNOBLOT

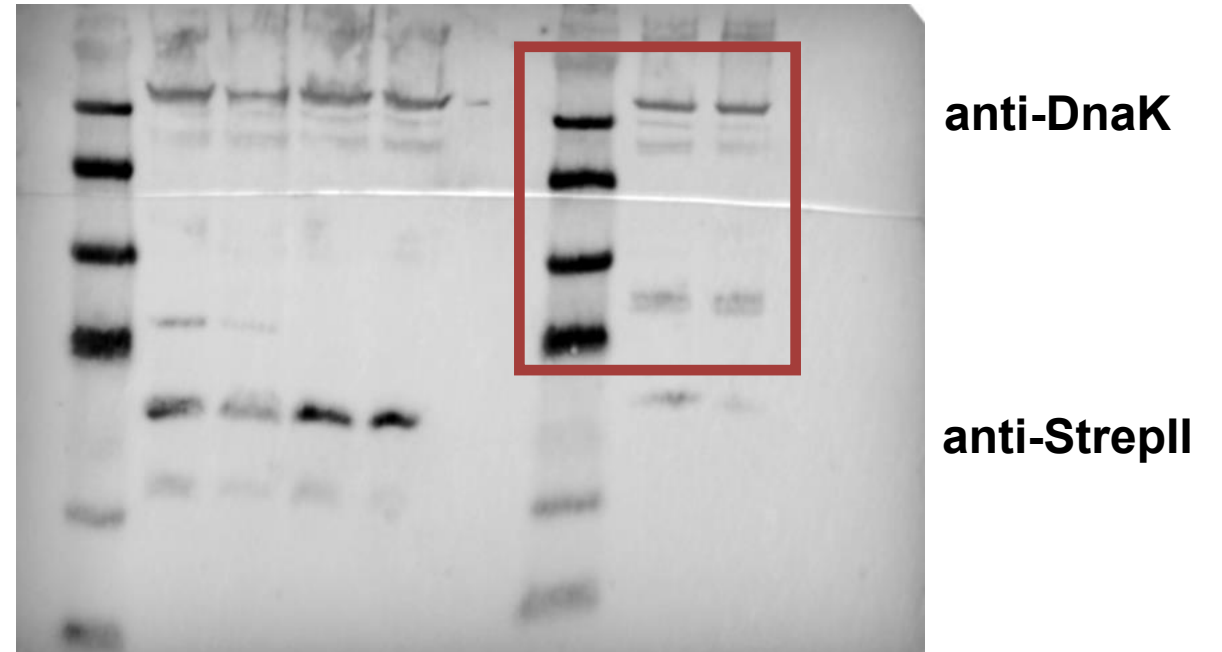

# Figure 5 - figure supplement 1B

**B**

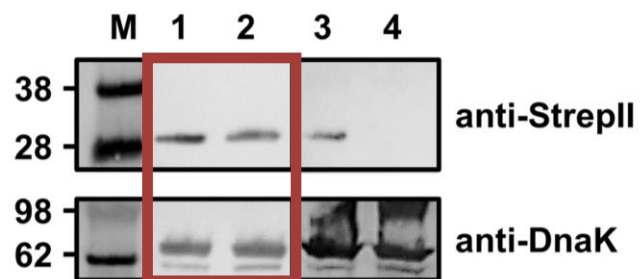

| LANE | STRAIN  |
|------|---------|
| 1    | MC-000  |
| 2    |         |
| 3    | MC-1000 |
| 4    |         |

  

| LANE | STRAIN  | Genetic Construct                                      |
|------|---------|--------------------------------------------------------|
| 1    | MC-000  | pDM1- <i>bla</i> <sub>POM-1</sub> -StrepII             |
| 2    |         | <i>dsbA</i> pDM1- <i>bla</i> <sub>POM-1</sub> -StrepII |
| 3    | MC-1000 | pDM1- <i>bla</i> <sub>SMB-1</sub> -StrepII             |
| 4    |         | <i>dsbA</i> pDM1- <i>bla</i> <sub>SMB-1</sub> -StrepII |

## FULL IMMUNOBLOT

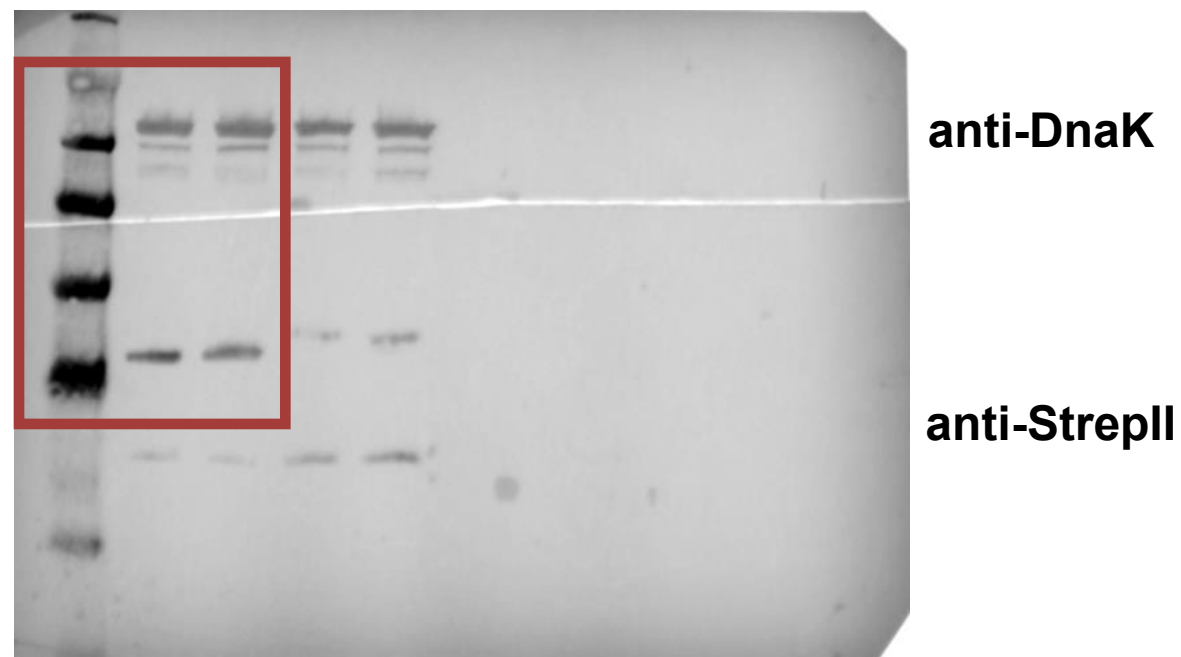

# Figure 5 - figure supplement 1B

**B**

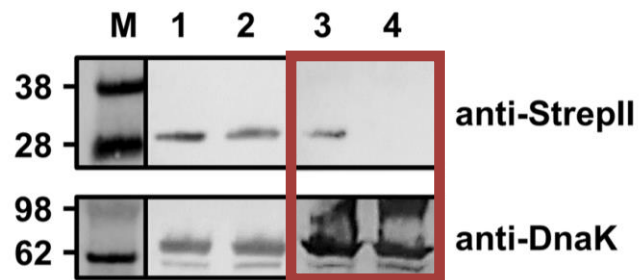

| LANE | STRAIN                                                         |
|------|----------------------------------------------------------------|
| 1    | MC <sup>000</sup> { pDM1- <i>bla</i> <sub>POM-1</sub> -StrepII |
| 2    |                                                                |
| 3    | MC <sup>000</sup> { pDM1- <i>bla</i> <sub>SMB-1</sub> -StrepII |
| 4    |                                                                |

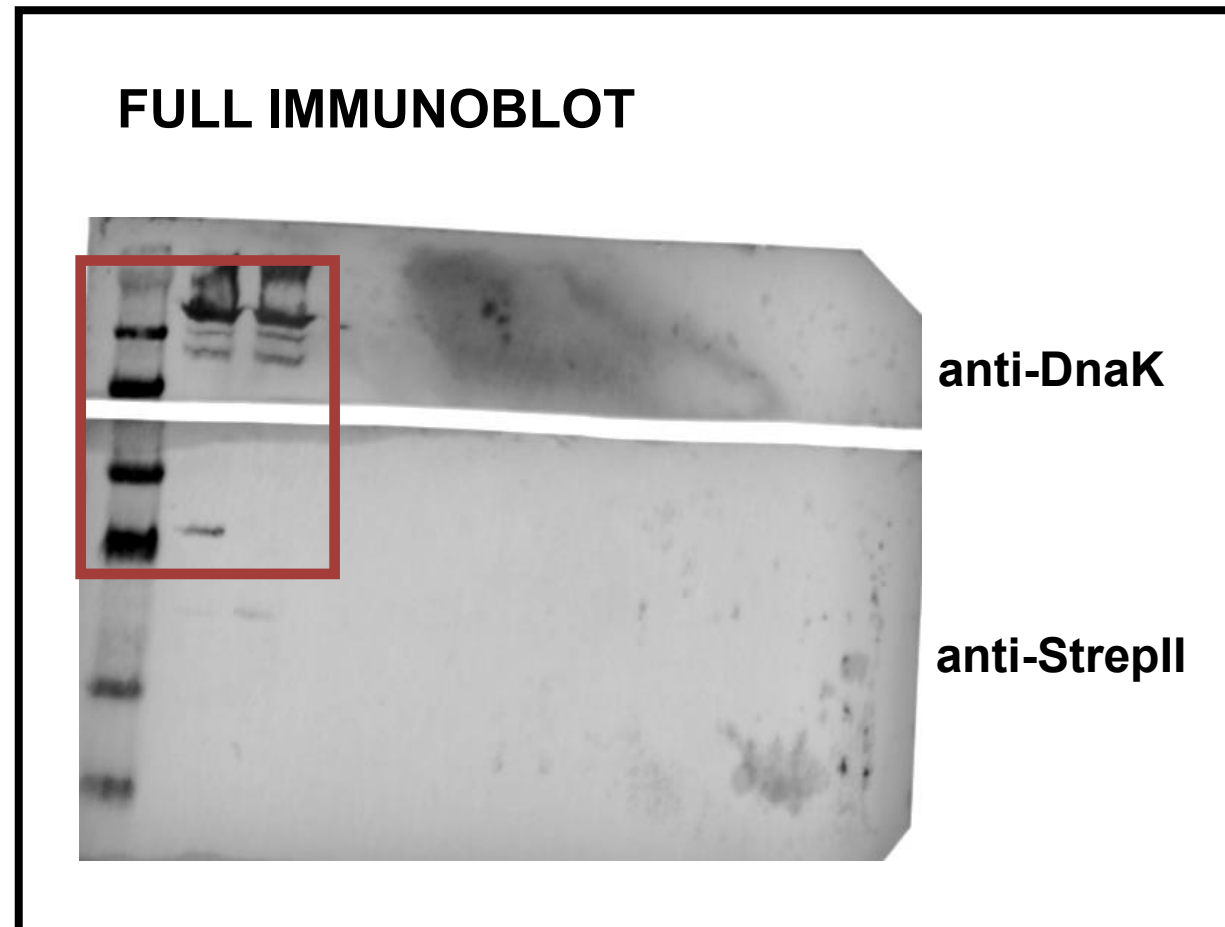

# **SDS PAGE GELS**

# Figure 2A

SDS-PAGE analysis of immunoblot samples for total protein content

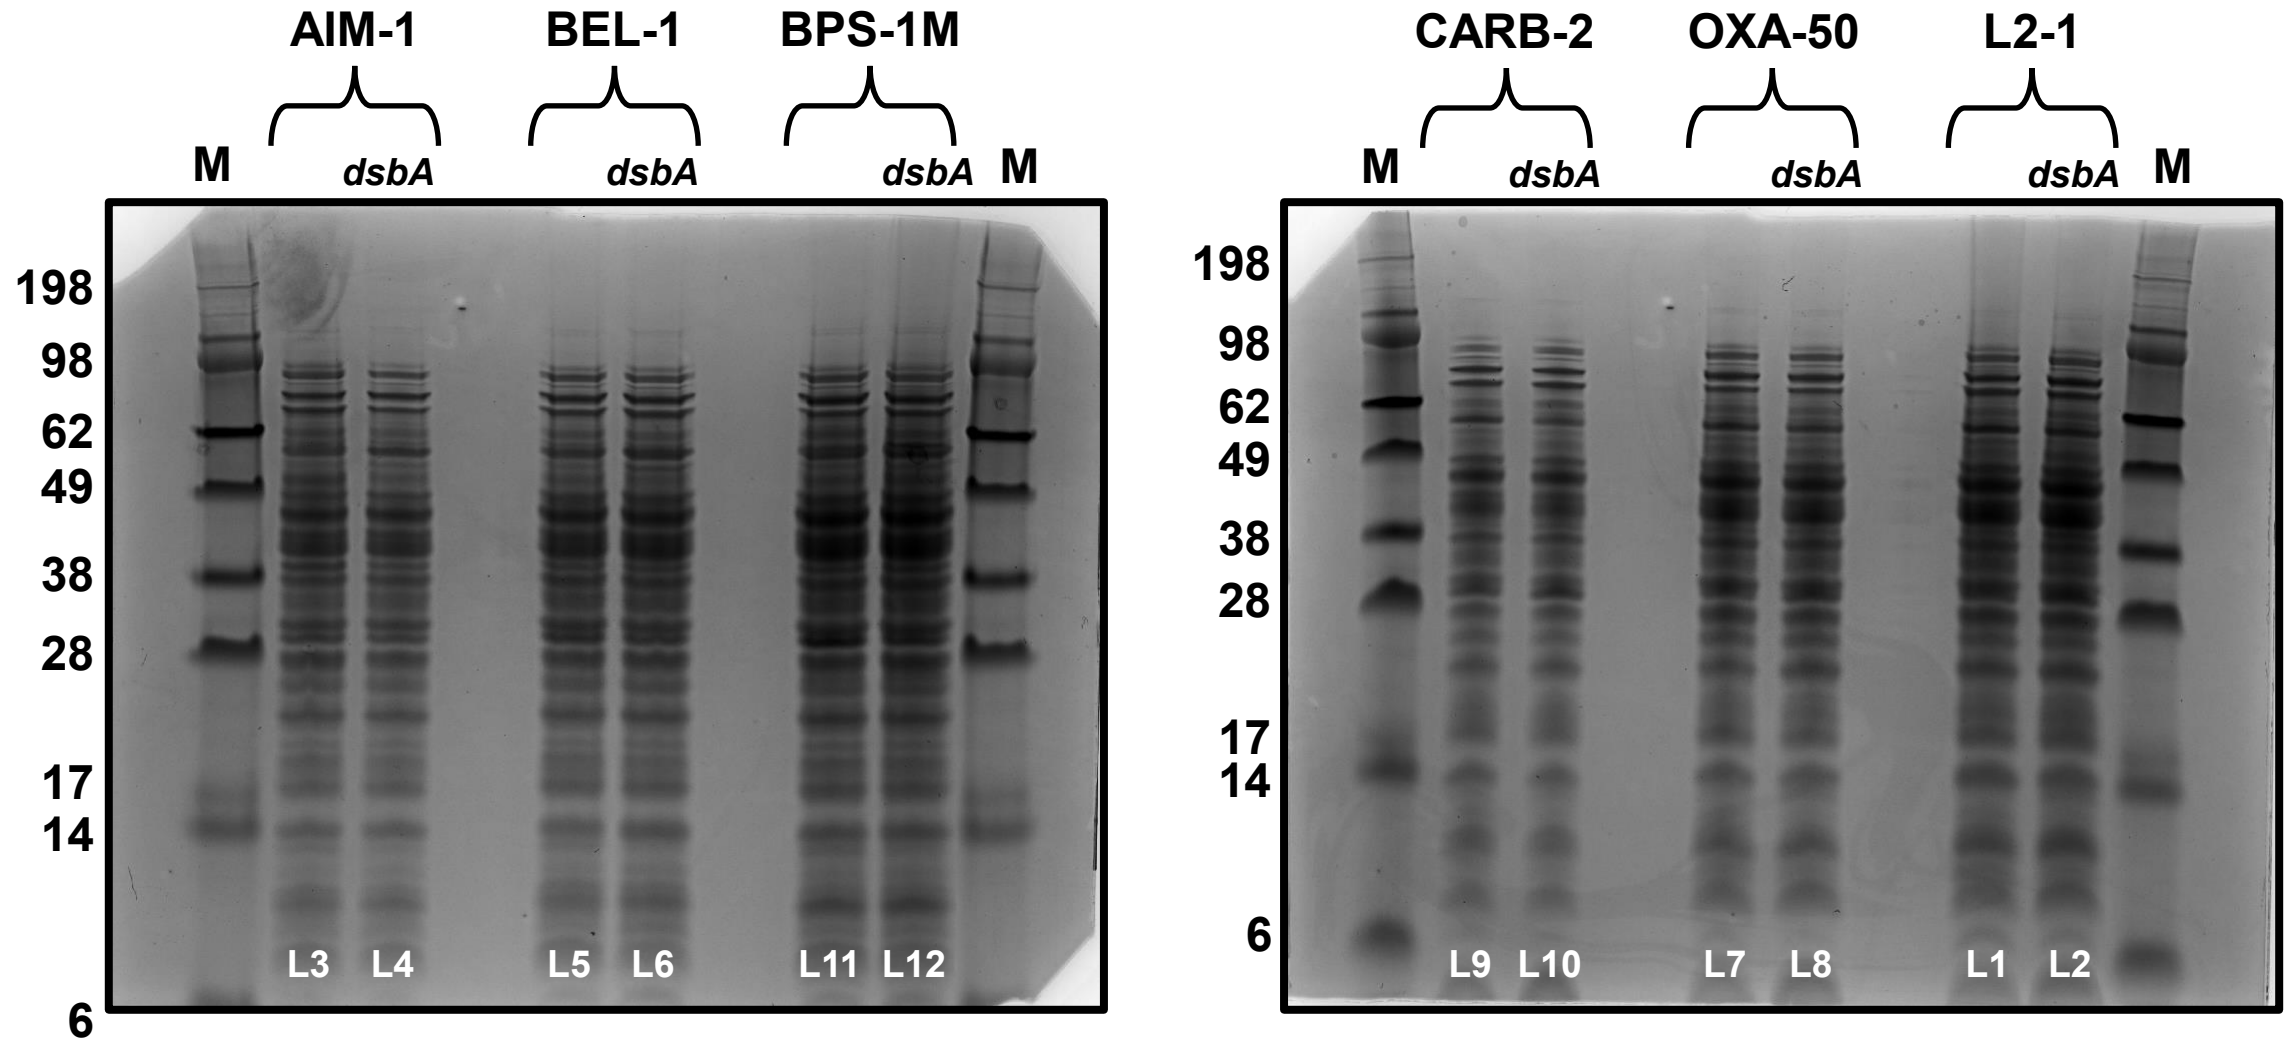

# Figure 5 - figure supplement 1B

SDS-PAGE analysis of immunoblot samples for total protein content

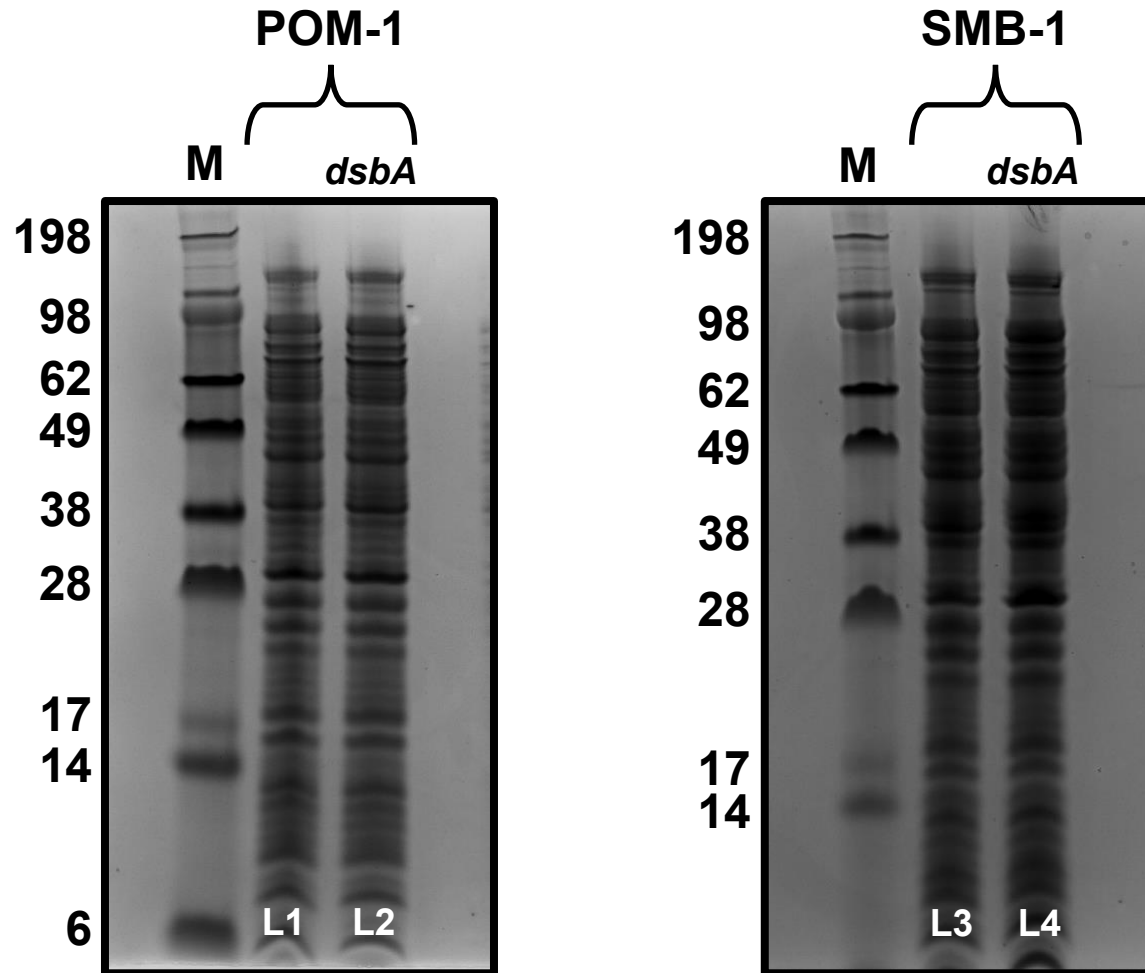

Supplement: supp3 [file elife-91082-supp3-v1.pdf]
