# Supplementary material for: Antibiotic potentiation and inhibition of cross-resistance in pathogens associated with cystic fibrosis
Source: eLife journal article supplement (doi:10.7554/elife.91082), 2023-10-11
Supplement: supp5 [file elife-91082-supp5-v1.pdf]

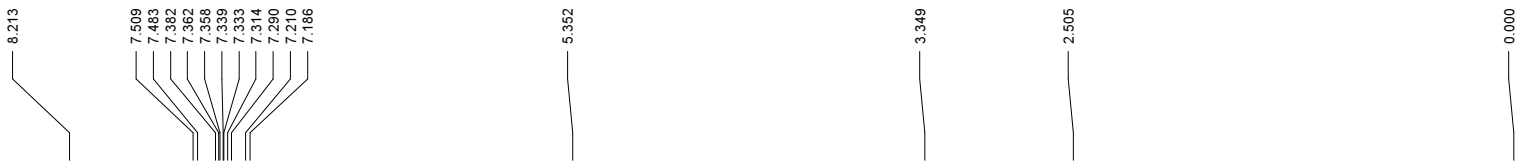

Varian Mercury Plus: 300 MHz

Solvent: DMSO

Y1359-08443-024

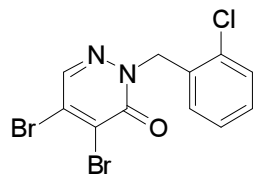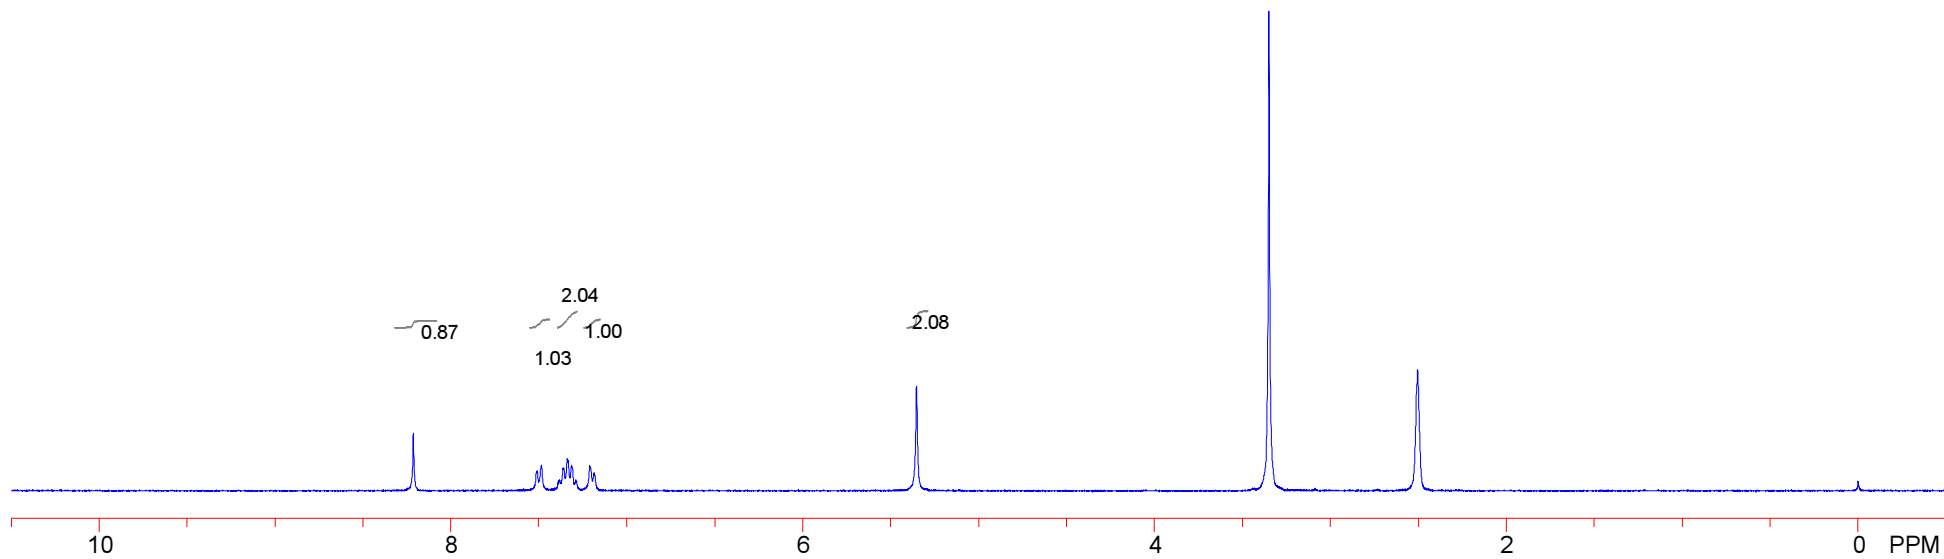

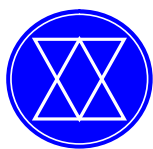

# Sundia Meditech Co.Ltd

## QC Report

388 Jialilue Road  
Zhangjiang Hightech Park  
Shanghai, China  
Post code : 201203  
Tel : 8621-51098642  
Fax : 8621-51903505

Sample Name : Y1359-08443-024  
Data File : D:\DATA-LCMS-3\2015\02\28\2015-02-28--1\Y1359-08443-02->  
Injection Date : Sat, 28. Feb. 2015 Inj. Vol. : 2ul  
Acq Operator : Shao Yan Location : Vial 4  
Acq. Method : D:\DATA-LCMS-3\2015\02\28\2015-02-28--1\P-30-95.M  
Sample Info.:  
Methods Info: column:C18;column size:4.6\*50mm ;mobile phase:B(ACN),  
A(0.02%NH4Ac); gradient(B%):as Acq.Method above

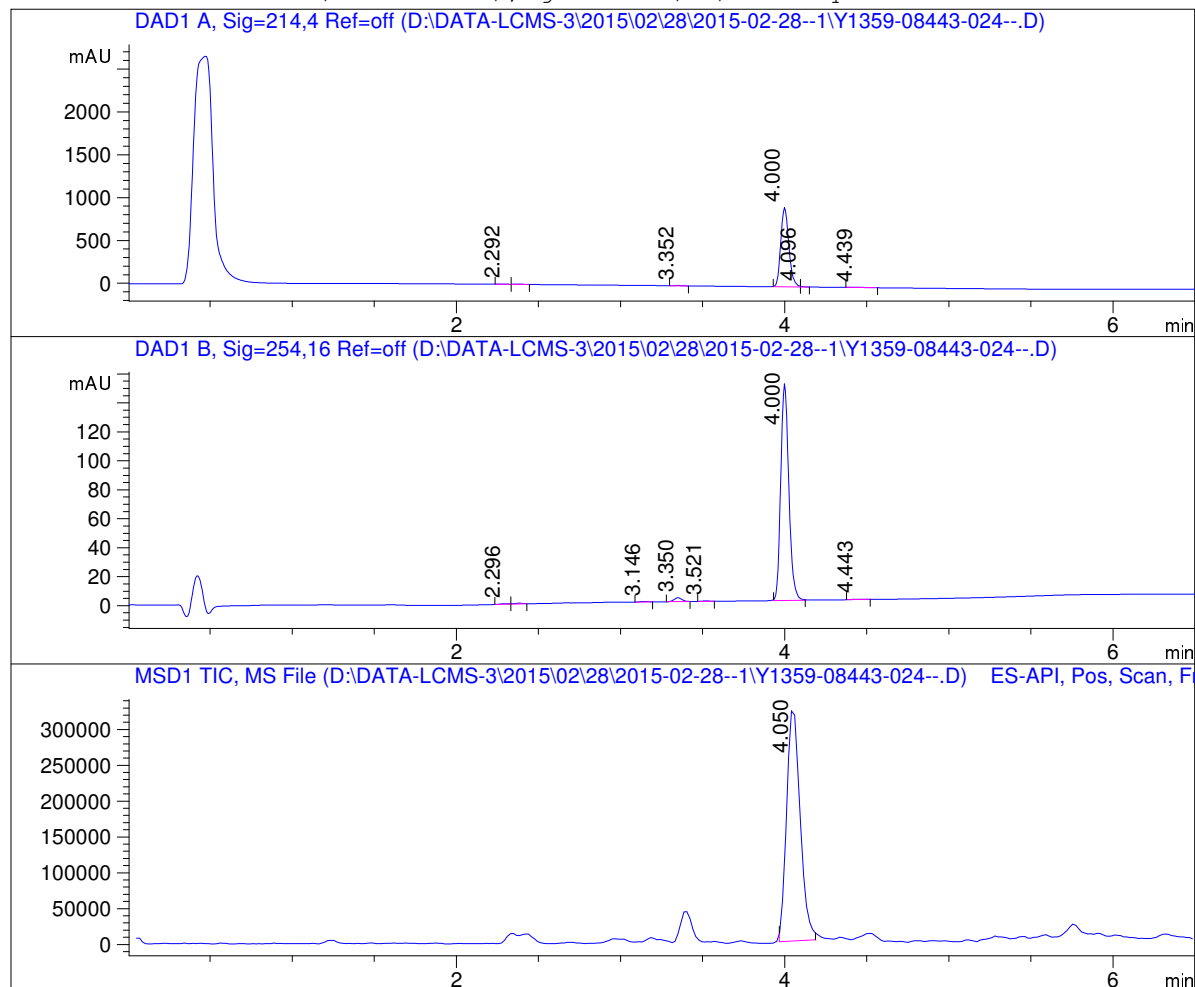

### Integration Results

Signal 1: DAD1 A, Sig=214,4 Ref=off

| # | R.T.  | Type | Height  | Height% | Width | Area     | Area % |
|---|-------|------|---------|---------|-------|----------|--------|
| 1 | 2.292 | MF   | 1.350   | 0.142   | 0.062 | 5.039    | 0.156  |
| 2 | 2.379 | FM   | 4.603   | 0.485   | 0.056 | 15.501   | 0.481  |
| 3 | 3.352 | MF   | 4.205   | 0.443   | 0.055 | 13.969   | 0.434  |
| 4 | 4.000 | FM   | 928.564 | 97.871  | 0.057 | 3164.489 | 98.265 |
| 5 | 4.096 | FM   | 7.268   | 0.766   | 0.015 | 6.688    | 0.208  |
| 6 | 4.439 | MF   | 2.777   | 0.293   | 0.088 | 14.675   | 0.456  |

| # | R.T. | Type | Height | Height% | Width | Area | Area % |
|---|------|------|--------|---------|-------|------|--------|
|---|------|------|--------|---------|-------|------|--------|

Signal 2: DAD1 B, Sig=254,16 Ref=off

| # | R.T.  | Type | Height  | Height% | Width | Area    | Area % |
|---|-------|------|---------|---------|-------|---------|--------|
| 1 | 2.296 | MF   | 0.367   | 0.237   | 0.054 | 1.187   | 0.225  |
| 2 | 2.384 | FM   | 0.530   | 0.343   | 0.057 | 1.803   | 0.341  |
| 3 | 3.146 | MM   | 0.432   | 0.280   | 0.054 | 1.411   | 0.267  |
| 4 | 3.350 | MF   | 2.661   | 1.723   | 0.054 | 8.696   | 1.646  |
| 5 | 3.521 | FM   | 0.297   | 0.192   | 0.060 | 1.076   | 0.204  |
| 6 | 4.000 | BB   | 149.820 | 97.008  | 0.054 | 512.694 | 97.043 |
| 7 | 4.443 | MM   | 0.334   | 0.216   | 0.072 | 1.450   | 0.274  |

Signal 3: MSD1 TIC, MS File

| # | R.T.  | Type | Height     | Height% | Width | Area       | Area %  |
|---|-------|------|------------|---------|-------|------------|---------|
| 1 | 4.050 | FM   | 330220.750 | 100.000 | 0.093 | 1.846e+006 | 100.000 |

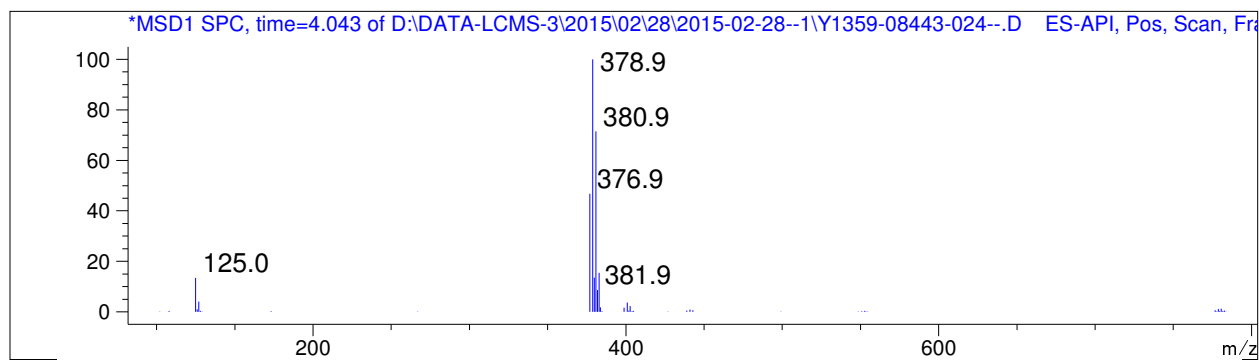

\*\*\* End of Report \*\*\*
