# Supplementary material for: Antibiotic potentiation and inhibition of cross-resistance in pathogens associated with cystic fibrosis
Source: eLife. 2026 Apr 21;12:RP91082. doi: 10.7554/eLife.91082 (PMC13099141; doi:10.7554/eLife.91082)
Supplement: Supplementary file 2. — (A) MIC values (µg/mL) used to generate Figure 1 are in rows 2–7 (strains serving as negative controls; E. coli MC1000 strains harboring pDM1 (vector alone), pDM1-blaL2-1 or pDM1-blaLUT-1 (cysteine-containing β-lactamases which lack disulfide bonds)) and rows 9–20. MIC values (µg/mL) used to generate Figure 5—figure supplement 1 are in rows 22–25. The aminoglycoside antibiotic gentamicin serves as a negative control for all strains. Cells marked with a dash (-) represent strain-antibiotic combinations that were not tested. (B) P. aeruginosa PA14 colony forming unit (CFU) counts used to generate Figure 4E. (C) P. aeruginosa PA14, S. maltophilia AMM, and S. maltophilia AMM dsbA dsbL CFU counts used to generate Figure 4—figure supplement 1B. For all tabs, three biological experiments are shown; for (B) and (C), each biological replicate was conducted in technical triplicate and mean CFU values are shown. [file elife-91082-supp2.xlsx]

## Sheet: File S2A
STRAIN	GENTAMICIN (GM)			AMOXICILLIN (AC)			AMPICILLIN (AM)			CEFUROXIME (XM)			CEFTAZIDIME (TZ)			IMIPENEM (IP)			AZTREONAM (AT)
MC1000 pDM1	0.5	1	1	6	6	4	-	-	-	6	6	6	0.38	0.38	0.25	0.19	0.19	0.19	0.19	0.125	0.125
MC1000 dsbA pdM1	0.5	1	1	6	6	6	-	-	-	6	4	4	0.19	0.19	0.25	0.19	0.19	0.25	0.125	0.125	0.125
MC1000 pDM1-blaL2-1	0.5	0.38	0.75	-	-	-	2000	2000	2000	-	-	-	8	12	8	-	-	-	500	500	500
MC1000 dsbA pDM1-blaL2-1	0.75	0.5	0.5	-	-	-	2000	2000	2000	-	-	-	8	8	6	-	-	-	250	500	500
MC1000 pDM1-blaLUT-1	0.38	0.75	0.5	-	-	-	2000	2000	2000	-	-	-	1.5	1.5	0.75	-	-	-	32	24	16
MC1000 dsbA pDM1-blaLUT-1	0.38	0.75	0.75	-	-	-	1000	2000	4000	-	-	-	1	1	0.75	-	-	-	32	26	16
MC1000 pDM1-blaBEL-1	0.75	0.75	1	-	-	-	2000	2000	4000	-	-	-	12	6	8	-	-	-	12	16	24
MC1000 dsbA pDM1-blaBEL-1	1	1	1.5	-	-	-	1000	500	2000	-	-	-	4	2	1.5	-	-	-	4	4	6
MC1000 pDM1-blaCARB-2	0.5	0.75	1	-	-	-	16000	16000	16000	12	12	12	-	-	-	-	-	-	-	-	-
MC1000 dsbA pDM1-blaCARB-2	0.75	0.75	0.75	-	-	-	8000	8000	8000	4	4	4	-	-	-	-	-	-	-	-	-
MC1000 pDM1-blaAIM-1	0.5	0.75	1	-	-	-	4000	4000	4000	-	-	-	6	6	6	1.5	1	2	-	-	-
MC1000 dsbA pDM1-blaAIM-1	0.5	0.75	1	-	-	-	250	250	250	-	-	-	0.75	0.75	0.5	0.75	0.25	0.38	-	-	-
MC1000 pDM1-blaOXA-50	1	0.75	0.75	8	12	8	-	-	-	24	16	16	-	-	-	-	-	-	-	-	-
MC1000 dsbA pDM1-blaOXA-50	0.75	0.75	1	4	6	6	-	-	-	8	3	3	-	-	-	-	-	-	-	-	-
MC1000 pDM1-blaBPS-1m	1	1	0.75	-	-	-	500	500	500	-	-	-	256	256	256	-	-	-	2	1.5	3
MC1000 dsbA pDM1-blaBPS-1m	0.75	0.75	0.75	-	-	-	250	250	250	-	-	-	24	12	24	-	-	-	0.25	0.38	0.75
MC1000 pDM1-blaBPS-6	0.38	0.25	0.19	256	256	256	-	-	-	-	-	-	32	32	64	-	-	-	-	-	-
MC1000 dsbA pDM1-blaBPS-6	0.5	0.25	0.38	64	64	64	-	-	-	-	-	-	3	2	3	-	-	-	-	-	-
MC1000 pDM1-blaPOM-1	0.75	1	1	-	-	-	4000	4000	4000	256	256	256	-	-	-	6	4	4	-	-	-
MC1000 dsbA pDM1-blaPOM-1	0.75	1	1.5	-	-	-	2000	2000	2000	32	48	64	-	-	-	3	2	1.5	-	-	-
MC1000 pDM1-blaSMB-1	1	0.75	1	-	-	-	4000	4000	2000	6	4	4	-	-	-	1.5	0.75	1	-	-	-
MC1000 dsbA pDM1-blaSMB-1	1.5	1	1.5	-	-	-	1000	1000	250	2	1.5	1.5	-	-	-	0.25	0.38	0.38	-	-	-

## Sheet: File S2B
CEFTAZIDIME (μg/mL)	P. aeruginosa PA14 CFUs			P. aeruginosa PA14 CFUs (+ S. maltophilia AMM)			P. aeruginosa PA14 CFUs (+ S. maltophilia AMM dsbA dsbL)
	REPLICATE 1	REPLICATE 2	REPLICATE3	REPLICATE 1	REPLICATE 2	REPLICATE 3	REPLICATE 1	REPLICATE 2	REPLICATE 3
2	2.27833e+08	5e+08	7.67e+08	7e+07	8e+07	1e+08	3e+08	2.4e+08	2.7685e+08
4	1.18833e+08	0.001	0.001	10000	2165	14666.7	1.7e+08	1.135e+08	1.2e+08
8	0.001	0.001	0.001	2315	1835	12566.7	0.001	273333	27666.7
16	0.001	0.001	0.001	5165	670.001	670.001	0.001	0.001	0.001
32	0.001	0.001	0.001	330.001	300.001	300.001	0.001	0.001	0.001
64	0.001	0.001	0.001	330.001	1650	300.001	0.001	0.001	0.001
128	0.001	0.001	0.001	2.685e+08	1.385e+08	1.895e+08	0.001	0.001	0.001
256	0.001	0.001	0.001	1.56667e+06	6.15e+06	2.45e+06	0.001	0.001	0.001
512	0.001	0.001	0.001	4.365e+06	166.668	89333.3	0.001	0.001	0.001
1024	0.001	0.001	0.001	0.001	0.001	0.001	0.001	0.001	0.001

## Sheet: File S2C
CEFTAZIDIME (μg/mL)	P. aeruginosa PA14 CFUs			P. aeruginosa PA14 CFUs (+ S. maltophilia AMM)			P. aeruginosa PA14 CFUs (+ S. maltophilia AMM dsbA dsbL)			S. maltophilia AMM CFUs			S. maltophilia AMM dsbA dsbL CFUs			S. maltophilia AMM CFUs (+ P. aeruginosa PA14)			S. maltophilia AMM dsbA dsbL CFUs (+ P. aeruginosa PA14)
	REPLICATE 1	REPLICATE 2	REPLICATE3	REPLICATE 1	REPLICATE 2	REPLICATE 3	REPLICATE 1	REPLICATE 2	REPLICATE 3	REPLICATE 1	REPLICATE 2	REPLICATE 3	REPLICATE 1	REPLICATE 2	REPLICATE 3	REPLICATE 1	REPLICATE 2	REPLICATE 3	REPLICATE 1	REPLICATE 2	REPLICATE 3
0	5700000000000000	2767000000000000	3200000000000000	233000000	267000000	30000000	1919000000	1367000000	99850000	53300000000	2101500000000	1250000000000	467600000000	600000000000	5000000000	967000000000000	1067000000000000	8000000000	60000000000	60000000000	1033000000
4	83350000	6670	18330	1670	116500	1000	55150000	76650000	7330000	733000000000000	633000000000000	26700000000000	11150000000000	567000000000	900000000	225150000000000	100000000000000	22315000000000	267000000	367000000	633000000
32	0	0	0	53150	985000	79850	1335000	2315000	2233000	41666700000000	108500000000000	101850000000000	15835000	10670000	16015000	567000000000000	2000000000000000	333000000000000	130150000	76700000	75000000
128	0	0	0	1670000	2000000	1670000	0.001	0.001	0.001	5511000000000	1801500000000	160150000000	0	0	0	700000000000000	900000000000000	8985000000	0	0	0
