# Supplementary material for: Antibiotic potentiation and inhibition of cross-resistance in pathogens associated with cystic fibrosis
Source: eLife. 2026 Apr 21;12:RP91082. doi: 10.7554/eLife.91082 (PMC13099141; doi:10.7554/eLife.91082)
Supplement: Supplementary file 4. — Hidden Markov Models built from validated sequences of MCR-like and EptA-like proteins were used for the identification of MCR-like analogs in a total of 106 complete genomes of the Stenotrophomonas genus downloaded from the NCBI repository. (A) Most genomes that were investigated (‘Stenotrophomonas maltophilia genome’ column), encoded one or two MCR-like proteins (‘Number of MCR analogues column’). (B) The 146 MCR-like sequences (‘Protein ID column’) that were identified (only hits with evalues <1e-10 were considered; ‘Evalue’ column) belong to the same phylogenetic group as validated MCR-5 or MCR-8 proteins (‘Phylogenetic group’ column). [file elife-91082-supp4.xlsx]

## Sheet: File S4A
STENOTROPHOMONAS MALTOPHILIA GENOME	NUMBER OF MCR ANALOGUES
Stenotrophomonas_maltophilia_GCF_023518235.1	2
Stenotrophomonas_sp._169_GCF_014621775.1	1
Stenotrophomonas_maltophilia_GCF_009618035.1	1
Stenotrophomonas_sp._NY11291_GCF_023277365.1	2
Stenotrophomonas_maltophilia_GCF_014076535.1	1
Stenotrophomonas_maltophilia_D457_GCF_000284595.1	2
Stenotrophomonas_sp._DR822_GCF_019793815.1	2
Stenotrophomonas_maltophilia_GCF_028891445.1	2
Stenotrophomonas_maltophilia_GCF_020641455.2	2
Stenotrophomonas_maltophilia_GCF_003812985.1	2
Stenotrophomonas_maltophilia_GCF_006974125.1	2
Stenotrophomonas_sp._MYb57_GCF_002966815.1	1
Stenotrophomonas_maltophilia_GCF_019048905.1	2
Stenotrophomonas_maltophilia_GCF_021441865.1	1
Stenotrophomonas_sp._WZN-1_GCF_002192255.1	1
Stenotrophomonas_maltophilia_GCF_021117255.1	2
Stenotrophomonas_maltophilia_GCF_009676385.1	1
Stenotrophomonas_sp._KCTC_12332_GCF_001562215.1	3
Stenotrophomonas_maltophilia_GCF_009676585.1	2
Stenotrophomonas_acidaminiphila_GCF_014076435.1	1
Stenotrophomonas_acidaminiphila_GCF_001314305.1	1
Stenotrophomonas_maltophilia_GCF_025200825.1	1
Stenotrophomonas_nitritireducens_GCF_001700965.1	3
Stenotrophomonas_maltophilia_GCF_011386925.1	2
Stenotrophomonas_maltophilia_GCF_012971765.1	2
Stenotrophomonas_maltophilia_GCF_021117195.1	2
Stenotrophomonas_maltophilia_GCF_021117175.1	2
Stenotrophomonas_maltophilia_GCF_009676485.1	2
Stenotrophomonas_maltophilia_GCF_012647025.1	2
Stenotrophomonas_maltophilia_GCF_027594805.1	2
Stenotrophomonas_maltophilia_GCF_009676505.1	2
Stenotrophomonas_sp._LM091_GCF_001806305.1	1
Stenotrophomonas_sp._SI-NJAU-1_GCF_020883215.1	2
Stenotrophomonas_maltophilia_GCF_001274675.1	2
Stenotrophomonas_maltophilia_GCF_009676405.1	2
Stenotrophomonas_maltophilia_GCF_900475405.1	2
Stenotrophomonas_maltophilia_GCF_001274595.1	1
Stenotrophomonas_maltophilia_K279a_GCF_000072485.1	2
Stenotrophomonas_maltophilia_GCF_900636905.1	2
Stenotrophomonas_sp._PAMC25021_GCF_004795795.1	2
Stenotrophomonas_maltophilia_GCF_003006435.1	1
Stenotrophomonas_maltophilia_GCF_009676445.1	1
Stenotrophomonas_maltophilia_GCF_014156975.1	2
Stenotrophomonas_maltophilia_GCF_918593995.1	2
Stenotrophomonas_maltophilia_GCF_025426215.1	2
Stenotrophomonas_maltophilia_GCF_009676545.1	2
Stenotrophomonas_maltophilia_GCF_023277525.1	1
Stenotrophomonas_maltophilia_GCF_002025605.1	1
Stenotrophomonas_acidaminiphila_GCF_014109845.1	2
Stenotrophomonas_maltophilia_GCF_008693985.1	2
Stenotrophomonas_sp._SBJS02_GCF_020428325.2	2
Stenotrophomonas_maltophilia_GCF_003030985.1	2
Stenotrophomonas_maltophilia_GCF_009676525.1	3
Stenotrophomonas_maltophilia_GCF_020641425.2	2
Stenotrophomonas_maltophilia_GCF_001274655.1	2
Stenotrophomonas_maltophilia_GCF_020641085.2	1
Stenotrophomonas_maltophilia_GCF_003205835.1	0
Stenotrophomonas_maltophilia_GCF_002208885.2	3
Stenotrophomonas_maltophilia_GCF_022014735.1	2
Stenotrophomonas_maltophilia_R551-3_GCF_000020665.1	1
Stenotrophomonas_maltophilia_GCF_011067225.1	2
Stenotrophomonas_maltophilia_GCF_009676425.1	2
Stenotrophomonas_maltophilia_GCF_021378335.1	2
Stenotrophomonas_maltophilia_GCF_002189545.2	3
Stenotrophomonas_maltophilia_GCF_009857175.1	2
Stenotrophomonas_maltophilia_GCF_009676465.1	2
Stenotrophomonas_rhizophila_GCF_011604605.1	3
Stenotrophomonas_maltophilia_GCF_025642255.1	2
Stenotrophomonas_maltophilia_GCF_016126935.1	2
Stenotrophomonas_maltophilia_JV3_GCF_000223885.1	1
Stenotrophomonas_maltophilia_GCF_020641365.2	2
Stenotrophomonas_maltophilia_GCF_002951115.1	2
Stenotrophomonas_maltophilia_GCF_900636655.1	2
Stenotrophomonas_maltophilia_GCF_009676565.1	1
Stenotrophomonas_sp._NA06056_GCF_013364355.1	1
Stenotrophomonas_maltophilia_GCF_020641075.2	2
Stenotrophomonas_maltophilia_GCF_020641095.2	2
Stenotrophomonas_indicatrix_GCF_019285675.1	2
Stenotrophomonas_maltophilia_GCF_009676605.1	3
Stenotrophomonas_maltophilia_GCF_021117215.1	2
Stenotrophomonas_maltophilia_GCF_900186865.1	2
Stenotrophomonas_rhizophila_GCF_001704155.1	1
Stenotrophomonas_sp._ASS1_GCF_004346925.1	1
Stenotrophomonas_maltophilia_GCF_016659185.1	0
Stenotrophomonas_sp._CW117_GCF_014844015.1	1
Stenotrophomonas_maltophilia_GCF_024734725.1	2
Stenotrophomonas_sp._SXG-1_GCF_014083965.1	2
Stenotrophomonas_sp._DFS-20110405_GCF_028752115.1	1
Stenotrophomonas_maltophilia_GCF_020641355.2	1
Stenotrophomonas_pavanii_GCF_019704495.1	2
Stenotrophomonas_maltophilia_GCF_002847385.1	1
Stenotrophomonas_indicatrix_GCF_004551575.1	2
Stenotrophomonas_maltophilia_GCF_002138415.1	1
Stenotrophomonas_maltophilia_GCF_900475685.1	2
Stenotrophomonas_maltophilia_GCF_020080085.1	2
Stenotrophomonas_sp._364_GCF_009832905.1	2
Stenotrophomonas_maltophilia_GCF_020641415.2	2
Stenotrophomonas_acidaminiphila_GCF_002951995.1	0
Stenotrophomonas_maltophilia_GCF_026428295.1	2
Stenotrophomonas_maltophilia_GCF_021117235.1	2
Stenotrophomonas_rhizophila_GCF_023518215.1	1
Stenotrophomonas_maltophilia_GCF_007833655.1	1
Stenotrophomonas_maltophilia_GCF_020132085.1	2
Stenotrophomonas_maltophilia_GCF_023702495.1	2
Stenotrophomonas_maltophilia_GCF_020641395.2	2
Stenotrophomonas_sp._G4_GCF_003428825.1	2

## Sheet: File S4B
STENOTROPHOMONAS MALTOPHILIA GENOME	PHYLOGENETIC GROUP	PROTEIN ID	EVALUE
Stenotrophomonas_maltophilia_GCF_023518235.1	MCR-8	WP_249843817.1	1.7e-247
Stenotrophomonas_maltophilia_GCF_023518235.1	MCR-5	WP_249843220.1	6.2e-154
Stenotrophomonas_sp._169_GCF_014621775.1	MCR-5	WP_223202841.1	1.6e-160
Stenotrophomonas_maltophilia_GCF_009618035.1	MCR-5	WP_012511820.1	3e-156
Stenotrophomonas_sp._NY11291_GCF_023277365.1	MCR-8	WP_248853599.1	1.2e-244
Stenotrophomonas_sp._NY11291_GCF_023277365.1	MCR-5	WP_248853792.1	1.3e-154
Stenotrophomonas_maltophilia_GCF_014076535.1	MCR-5	WP_182266517.1	2.1e-155
Stenotrophomonas_maltophilia_D457_GCF_000284595.1	MCR-8	WP_014647410.1	2.9e-246
Stenotrophomonas_maltophilia_D457_GCF_000284595.1	MCR-5	WP_014648014.1	8.8e-156
Stenotrophomonas_sp._DR822_GCF_019793815.1	MCR-8	WP_261311904.1	7.5e-238
Stenotrophomonas_sp._DR822_GCF_019793815.1	MCR-5	WP_222388580.1	8.4e-154
Stenotrophomonas_maltophilia_GCF_028891445.1	MCR-8	WP_180872530.1	4.6e-249
Stenotrophomonas_maltophilia_GCF_028891445.1	MCR-5	WP_049397846.1	1.7e-154
Stenotrophomonas_maltophilia_GCF_020641455.2	MCR-8	WP_043035244.1	3.1e-249
Stenotrophomonas_maltophilia_GCF_020641455.2	MCR-5	WP_043034531.1	8.3e-155
Stenotrophomonas_maltophilia_GCF_003812985.1	MCR-8	WP_123958661.1	5e-249
Stenotrophomonas_maltophilia_GCF_003812985.1	MCR-5	WP_123958867.1	3.2e-155
Stenotrophomonas_maltophilia_GCF_006974125.1	MCR-8	WP_142806149.1	1.1e-248
Stenotrophomonas_maltophilia_GCF_006974125.1	MCR-5	WP_099555361.1	2.5e-154
Stenotrophomonas_sp._MYb57_GCF_002966815.1	MCR-5	WP_032977235.1	1.3e-154
Stenotrophomonas_maltophilia_GCF_019048905.1	MCR-8	WP_239682862.1	1.4e-244
Stenotrophomonas_maltophilia_GCF_019048905.1	MCR-5	WP_217013953.1	4.3e-155
Stenotrophomonas_maltophilia_GCF_021441865.1	MCR-5	WP_164089864.1	1.6e-155
Stenotrophomonas_sp._WZN-1_GCF_002192255.1	MCR-5	WP_087923307.1	5e-155
Stenotrophomonas_maltophilia_GCF_021117255.1	MCR-8	WP_134969329.1	1.2e-243
Stenotrophomonas_maltophilia_GCF_021117255.1	MCR-5	WP_061479820.1	7.5e-155
Stenotrophomonas_maltophilia_GCF_009676385.1	MCR-5	WP_059064800.1	9.5e-154
Stenotrophomonas_sp._KCTC_12332_GCF_001562215.1	MCR-5	WP_231732481.1	3e-157
Stenotrophomonas_sp._KCTC_12332_GCF_001562215.1	MCR-5	WP_231732472.1	3.6e-157
Stenotrophomonas_sp._KCTC_12332_GCF_001562215.1	MCR-5	WP_055765228.1	1.4e-158
Stenotrophomonas_maltophilia_GCF_009676585.1	MCR-5	WP_055765228.1	1.4e-158
Stenotrophomonas_maltophilia_GCF_009676585.1	MCR-5	WP_154353144.1	1.6e-155
Stenotrophomonas_acidaminiphila_GCF_014076435.1	MCR-5	WP_056930764.1	2.1e-163
Stenotrophomonas_acidaminiphila_GCF_001314305.1	MCR-5	WP_054666981.1	3.8e-163
Stenotrophomonas_maltophilia_GCF_025200825.1	MCR-5	WP_260363469.1	1.8e-154
Stenotrophomonas_nitritireducens_GCF_001700965.1	MCR-5	WP_231732481.1	3e-157
Stenotrophomonas_nitritireducens_GCF_001700965.1	MCR-5	WP_055765228.1	1.4e-158
Stenotrophomonas_nitritireducens_GCF_001700965.1	MCR-5	WP_055765228.1	1.4e-158
Stenotrophomonas_maltophilia_GCF_011386925.1	MCR-8	WP_165710516.1	5.2e-246
Stenotrophomonas_maltophilia_GCF_011386925.1	MCR-5	WP_049397846.1	1.7e-154
Stenotrophomonas_maltophilia_GCF_012971765.1	MCR-5	WP_169448273.1	7.8e-155
Stenotrophomonas_maltophilia_GCF_012971765.1	MCR-8	WP_088437093.1	5.7e-250
Stenotrophomonas_maltophilia_GCF_021117195.1	MCR-5	WP_114619100.1	1.9e-154
Stenotrophomonas_maltophilia_GCF_021117195.1	MCR-8	WP_231347439.1	1.4e-246
Stenotrophomonas_maltophilia_GCF_021117175.1	MCR-8	WP_062606571.1	1.2e-246
Stenotrophomonas_maltophilia_GCF_021117175.1	MCR-5	WP_062607898.1	3e-155
Stenotrophomonas_maltophilia_GCF_009676485.1	MCR-8	WP_111205417.1	7.7e-249
Stenotrophomonas_maltophilia_GCF_009676485.1	MCR-5	WP_014648014.1	8.8e-156
Stenotrophomonas_maltophilia_GCF_012647025.1	MCR-5	WP_005414185.1	7.5e-155
Stenotrophomonas_maltophilia_GCF_012647025.1	MCR-8	WP_005413690.1	6e-247
Stenotrophomonas_maltophilia_GCF_027594805.1	MCR-8	WP_154329474.1	9.5e-249
Stenotrophomonas_maltophilia_GCF_027594805.1	MCR-5	WP_099484590.1	8.9e-155
Stenotrophomonas_maltophilia_GCF_009676505.1	MCR-8	WP_229301544.1	1.9e-246
Stenotrophomonas_maltophilia_GCF_009676505.1	MCR-5	WP_155029944.1	2.1e-154
Stenotrophomonas_sp._LM091_GCF_001806305.1	MCR-5	WP_070425680.1	7.7e-157
Stenotrophomonas_sp._SI-NJAU-1_GCF_020883215.1	MCR-8	WP_229291347.1	3.3e-239
Stenotrophomonas_sp._SI-NJAU-1_GCF_020883215.1	MCR-5	WP_229290117.1	1.4e-154
Stenotrophomonas_maltophilia_GCF_001274675.1	MCR-8	WP_053443172.1	5.6e-248
Stenotrophomonas_maltophilia_GCF_001274675.1	MCR-5	WP_010482802.1	1.6e-154
Stenotrophomonas_maltophilia_GCF_009676405.1	MCR-8	WP_088431232.1	1.5e-249
Stenotrophomonas_maltophilia_GCF_009676405.1	MCR-5	WP_154267967.1	1e-154
Stenotrophomonas_maltophilia_GCF_900475405.1	MCR-8	WP_049452513.1	8.3e-251
Stenotrophomonas_maltophilia_GCF_900475405.1	MCR-5	WP_062607898.1	3e-155
Stenotrophomonas_maltophilia_GCF_001274595.1	MCR-5	WP_053450492.1	1e-155
Stenotrophomonas_maltophilia_K279a_GCF_000072485.1	MCR-8	WP_012480500.1	9.2e-250
Stenotrophomonas_maltophilia_K279a_GCF_000072485.1	MCR-5	WP_012480986.1	7.3e-155
Stenotrophomonas_maltophilia_GCF_900636905.1	MCR-5	WP_014648014.1	8.8e-156
Stenotrophomonas_maltophilia_GCF_900636905.1	MCR-8	WP_126412446.1	8.8e-249
Stenotrophomonas_sp._PAMC25021_GCF_004795795.1	MCR-5	WP_014648014.1	8.8e-156
Stenotrophomonas_sp._PAMC25021_GCF_004795795.1	MCR-8	WP_111205417.1	7.7e-249
Stenotrophomonas_maltophilia_GCF_003006435.1	MCR-5	WP_106468823.1	3.4e-155
Stenotrophomonas_maltophilia_GCF_009676445.1	MCR-5	WP_006383315.1	5.2e-155
Stenotrophomonas_maltophilia_GCF_014156975.1	MCR-8	WP_111117580.1	1.5e-249
Stenotrophomonas_maltophilia_GCF_014156975.1	MCR-5	WP_049397846.1	1.7e-154
Stenotrophomonas_maltophilia_GCF_918593995.1	MCR-8	WP_267065868.1	1.1e-241
Stenotrophomonas_maltophilia_GCF_918593995.1	MCR-5	WP_228354700.1	5.8e-154
Stenotrophomonas_maltophilia_GCF_025426215.1	MCR-5	WP_049397846.1	1.7e-154
Stenotrophomonas_maltophilia_GCF_025426215.1	MCR-8	WP_100438590.1	3.6e-248
Stenotrophomonas_maltophilia_GCF_009676545.1	MCR-8	WP_154330750.1	6.9e-248
Stenotrophomonas_maltophilia_GCF_009676545.1	MCR-5	WP_057493452.1	8.1e-156
Stenotrophomonas_maltophilia_GCF_023277525.1	MCR-5	WP_248858082.1	1.1e-153
Stenotrophomonas_maltophilia_GCF_002025605.1	MCR-5	WP_079222766.1	2.5e-153
Stenotrophomonas_acidaminiphila_GCF_014109845.1	MCR-5	WP_182335392.1	6e-157
Stenotrophomonas_acidaminiphila_GCF_014109845.1	MCR-5	WP_182334898.1	6e-164
Stenotrophomonas_maltophilia_GCF_008693985.1	MCR-5	WP_150359229.1	1.7e-154
Stenotrophomonas_maltophilia_GCF_008693985.1	MCR-8	WP_138969905.1	1.3e-246
Stenotrophomonas_sp._SBJS02_GCF_020428325.2	MCR-8	WP_208043327.1	5.8e-250
Stenotrophomonas_sp._SBJS02_GCF_020428325.2	MCR-5	WP_099589598.1	1.5e-155
Stenotrophomonas_maltophilia_GCF_003030985.1	MCR-8	WP_107379734.1	1.7e-250
Stenotrophomonas_maltophilia_GCF_003030985.1	MCR-5	WP_049445495.1	4.9e-156
Stenotrophomonas_maltophilia_GCF_009676525.1	MCR-5	WP_017354999.1	5.2e-159
Stenotrophomonas_maltophilia_GCF_009676525.1	MCR-8	WP_154349227.1	2.1e-248
Stenotrophomonas_maltophilia_GCF_009676525.1	MCR-5	WP_049445495.1	4.9e-156
Stenotrophomonas_maltophilia_GCF_020641425.2	MCR-8	WP_227844708.1	1e-242
Stenotrophomonas_maltophilia_GCF_020641425.2	MCR-5	WP_180877970.1	7.9e-154
Stenotrophomonas_maltophilia_GCF_001274655.1	MCR-8	WP_053443172.1	5.6e-248
Stenotrophomonas_maltophilia_GCF_001274655.1	MCR-5	WP_010482802.1	1.6e-154
Stenotrophomonas_maltophilia_GCF_020641085.2	MCR-5	WP_088497634.1	6.9e-155
Stenotrophomonas_maltophilia_GCF_002208885.2	MCR-8	WP_049471375.1	2.6e-249
Stenotrophomonas_maltophilia_GCF_002208885.2	MCR-5	WP_017354999.1	5.2e-159
Stenotrophomonas_maltophilia_GCF_002208885.2	MCR-5	WP_049460124.1	2.3e-155
Stenotrophomonas_maltophilia_GCF_022014735.1	MCR-8	WP_088437093.1	5.7e-250
Stenotrophomonas_maltophilia_GCF_022014735.1	MCR-5	WP_049450941.1	3.3e-155
Stenotrophomonas_maltophilia_R551-3_GCF_000020665.1	MCR-5	WP_012511820.1	3e-156
Stenotrophomonas_maltophilia_GCF_011067225.1	MCR-8	WP_242630026.1	5.2e-242
Stenotrophomonas_maltophilia_GCF_011067225.1	MCR-5	WP_165377821.1	1.7e-153
Stenotrophomonas_maltophilia_GCF_009676425.1	MCR-8	WP_154329474.1	9.5e-249
Stenotrophomonas_maltophilia_GCF_009676425.1	MCR-5	WP_099484590.1	8.9e-155
Stenotrophomonas_maltophilia_GCF_021378335.1	MCR-5	WP_233653868.1	3.9e-155
Stenotrophomonas_maltophilia_GCF_021378335.1	MCR-8	WP_233652742.1	5.6e-244
Stenotrophomonas_maltophilia_GCF_002189545.2	MCR-5	WP_012204570.1	5.5e-164
Stenotrophomonas_maltophilia_GCF_002189545.2	MCR-8	WP_049407306.1	4.4e-247
Stenotrophomonas_maltophilia_GCF_002189545.2	MCR-5	WP_049407131.1	2.3e-156
Stenotrophomonas_maltophilia_GCF_009857175.1	MCR-8	WP_043396358.1	3.2e-245
Stenotrophomonas_maltophilia_GCF_009857175.1	MCR-5	WP_159360451.1	2.4e-154
Stenotrophomonas_maltophilia_GCF_009676465.1	MCR-8	WP_154350970.1	4.3e-244
Stenotrophomonas_maltophilia_GCF_009676465.1	MCR-5	WP_154351223.1	5.9e-155
Stenotrophomonas_rhizophila_GCF_011604605.1	MCR-5	WP_017354999.1	5.2e-159
Stenotrophomonas_rhizophila_GCF_011604605.1	MCR-5	WP_166473325.1	1.6e-160
Stenotrophomonas_rhizophila_GCF_011604605.1	MCR-8	WP_208020009.1	7.9e-259
Stenotrophomonas_maltophilia_GCF_025642255.1	MCR-5	WP_053519018.1	8.4e-157
Stenotrophomonas_maltophilia_GCF_025642255.1	MCR-8	WP_263176273.1	3.9e-225
Stenotrophomonas_maltophilia_GCF_016126935.1	MCR-8	WP_024958595.1	1.4e-248
Stenotrophomonas_maltophilia_GCF_016126935.1	MCR-5	WP_024957204.1	1.9e-154
Stenotrophomonas_maltophilia_JV3_GCF_000223885.1	MCR-5	WP_014038104.1	3.9e-155
Stenotrophomonas_maltophilia_GCF_020641365.2	MCR-8	WP_227853027.1	2.7e-245
Stenotrophomonas_maltophilia_GCF_020641365.2	MCR-5	WP_227852364.1	1e-153
Stenotrophomonas_maltophilia_GCF_002951115.1	MCR-8	WP_033835607.1	1.1e-249
Stenotrophomonas_maltophilia_GCF_002951115.1	MCR-5	WP_033834365.1	1.7e-153
Stenotrophomonas_maltophilia_GCF_900636655.1	MCR-5	WP_057501071.1	2.4e-156
Stenotrophomonas_maltophilia_GCF_900636655.1	MCR-8	WP_057500426.1	6.3e-247
Stenotrophomonas_maltophilia_GCF_009676565.1	MCR-5	WP_154264166.1	1.3e-154
Stenotrophomonas_sp._NA06056_GCF_013364355.1	MCR-5	WP_176019954.1	3.1e-154
Stenotrophomonas_maltophilia_GCF_020641075.2	MCR-8	WP_099481280.1	6.1e-247
Stenotrophomonas_maltophilia_GCF_020641075.2	MCR-5	WP_099480887.1	2.1e-154
Stenotrophomonas_maltophilia_GCF_020641095.2	MCR-8	WP_227864606.1	5.1e-249
Stenotrophomonas_maltophilia_GCF_020641095.2	MCR-5	WP_014648014.1	8.8e-156
Stenotrophomonas_indicatrix_GCF_019285675.1	MCR-8	WP_218787514.1	2.4e-238
Stenotrophomonas_indicatrix_GCF_019285675.1	MCR-5	WP_218787831.1	2.2e-154
Stenotrophomonas_maltophilia_GCF_009676605.1	MCR-8	WP_229302650.1	5.1e-235
Stenotrophomonas_maltophilia_GCF_009676605.1	MCR-5	WP_049397846.1	1.7e-154
Stenotrophomonas_maltophilia_GCF_009676605.1	MCR-5	WP_049395624.1	9.1e-166
Stenotrophomonas_maltophilia_GCF_021117215.1	MCR-8	WP_049469566.1	1.4e-247
Stenotrophomonas_maltophilia_GCF_021117215.1	MCR-5	WP_049467490.1	7.5e-156
Stenotrophomonas_maltophilia_GCF_900186865.1	MCR-8	WP_024958595.1	1.4e-248
Stenotrophomonas_maltophilia_GCF_900186865.1	MCR-5	WP_024957204.1	1.9e-154
Stenotrophomonas_rhizophila_GCF_001704155.1	MCR-5	WP_237334365.1	1e-156
Stenotrophomonas_sp._ASS1_GCF_004346925.1	MCR-5	WP_132810603.1	9.8e-156
Stenotrophomonas_sp._CW117_GCF_014844015.1	MCR-5	WP_056930764.1	2.1e-163
Stenotrophomonas_maltophilia_GCF_024734725.1	MCR-8	WP_049397967.1	5e-249
Stenotrophomonas_maltophilia_GCF_024734725.1	MCR-5	WP_049397846.1	1.7e-154
Stenotrophomonas_sp._SXG-1_GCF_014083965.1	MCR-8	WP_191849502.1	1.8e-243
Stenotrophomonas_sp._SXG-1_GCF_014083965.1	MCR-5	WP_191849798.1	1.6e-154
Stenotrophomonas_sp._DFS-20110405_GCF_028752115.1	MCR-5	WP_274510891.1	1.4e-155
Stenotrophomonas_maltophilia_GCF_020641355.2	MCR-5	WP_099497603.1	2.2e-154
Stenotrophomonas_pavanii_GCF_019704495.1	MCR-8	WP_049469566.1	1.4e-247
Stenotrophomonas_pavanii_GCF_019704495.1	MCR-5	WP_049467490.1	7.5e-156
Stenotrophomonas_maltophilia_GCF_002847385.1	MCR-5	WP_101765916.1	5.6e-156
Stenotrophomonas_indicatrix_GCF_004551575.1	MCR-8	WP_134832552.1	7.5e-239
Stenotrophomonas_indicatrix_GCF_004551575.1	MCR-5	WP_134832931.1	1.8e-153
Stenotrophomonas_maltophilia_GCF_002138415.1	MCR-5	WP_088026779.1	2.9e-154
Stenotrophomonas_maltophilia_GCF_900475685.1	MCR-8	WP_100438590.1	3.6e-248
Stenotrophomonas_maltophilia_GCF_900475685.1	MCR-5	WP_100443085.1	1.6e-154
Stenotrophomonas_maltophilia_GCF_020080085.1	MCR-8	WP_100438590.1	3.6e-248
Stenotrophomonas_maltophilia_GCF_020080085.1	MCR-5	WP_049397846.1	1.7e-154
Stenotrophomonas_sp._364_GCF_009832905.1	MCR-8	WP_159497064.1	1.2e-262
Stenotrophomonas_sp._364_GCF_009832905.1	MCR-5	WP_159497545.1	9.4e-161
Stenotrophomonas_maltophilia_GCF_020641415.2	MCR-8	WP_227853830.1	3.7e-247
Stenotrophomonas_maltophilia_GCF_020641415.2	MCR-5	WP_021203175.1	1.4e-153
Stenotrophomonas_maltophilia_GCF_026428295.1	MCR-8	WP_114619100.1	1.9e-154
Stenotrophomonas_maltophilia_GCF_026428295.1	MCR-8	WP_062606571.1	1.2e-246
Stenotrophomonas_maltophilia_GCF_021117235.1	MCR-5	WP_049467490.1	7.5e-156
Stenotrophomonas_maltophilia_GCF_021117235.1	MCR-8	WP_049469566.1	1.4e-247
Stenotrophomonas_rhizophila_GCF_023518215.1	MCR-5	WP_249832921.1	2.2e-158
Stenotrophomonas_maltophilia_GCF_007833655.1	MCR-5	WP_189720780.1	1e-154
Stenotrophomonas_maltophilia_GCF_020132085.1	MCR-8	WP_224328229.1	3.8e-244
Stenotrophomonas_maltophilia_GCF_020132085.1	MCR-5	WP_224328370.1	6.5e-154
Stenotrophomonas_maltophilia_GCF_023702495.1	MCR-8	WP_076740104.1	7.4e-249
Stenotrophomonas_maltophilia_GCF_023702495.1	MCR-5	WP_049397846.1	1.7e-154
Stenotrophomonas_maltophilia_GCF_020641395.2	MCR-8	WP_197584282.1	5e-250
Stenotrophomonas_maltophilia_GCF_020641395.2	MCR-5	WP_227416041.1	3.1e-155
Stenotrophomonas_sp._G4_GCF_003428825.1	MCR-8	WP_117310425.1	4.3e-239
Stenotrophomonas_sp._G4_GCF_003428825.1	MCR-5	WP_117311017.1	9.3e-155
